# Supplementary material for: Effects of hypoxia and non-lethal shell damage on shell mechanical and geochemical properties of a calcifying polychaete
Source: Copernicus journal article supplement (doi:10.5194/bg-15-3267-2018), 2018-06-01
Supplement: Supplementary file 1 [file bg-15-3267-2018-supplement.pdf]

Supplement of Biogeosciences, 15, 3267–3276, 2018  
<https://doi.org/10.5194/bg-15-3267-2018-supplement>  
© Author(s) 2018. This work is distributed under  
the Creative Commons Attribution 4.0 License.

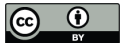

*Supplement of*

## **Effects of hypoxia and non-lethal shell damage on shell mechanical and geochemical properties of a calcifying polychaete**

**Jonathan Y. S. Leung and Napo K. M. Cheung**

*Correspondence to:* Jonathan Y. S. Leung ([jonathan\\_0919@hotmail.com](mailto:jonathan_0919@hotmail.com))

The copyright of individual parts of the supplement might differ from the CC BY 4.0 License.

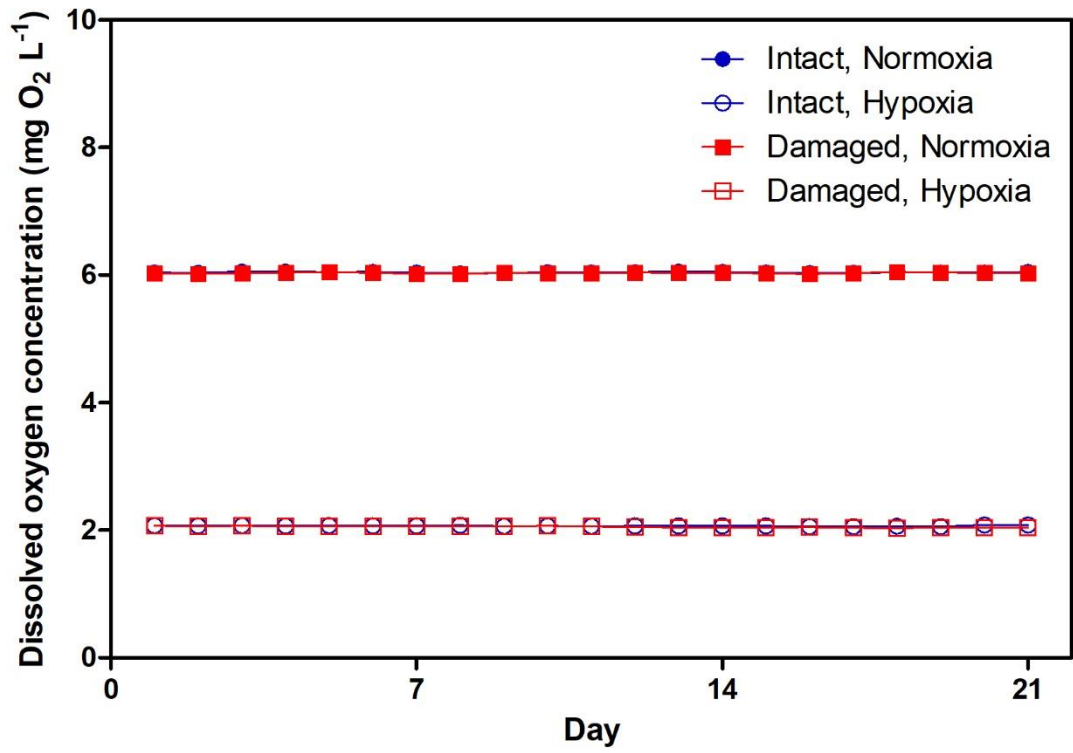

Figure S1 Dissolved oxygen concentration of seawater in different treatments across the 3-week experimental period (mean  $\pm$  S.D.,  $n = 3$ ).

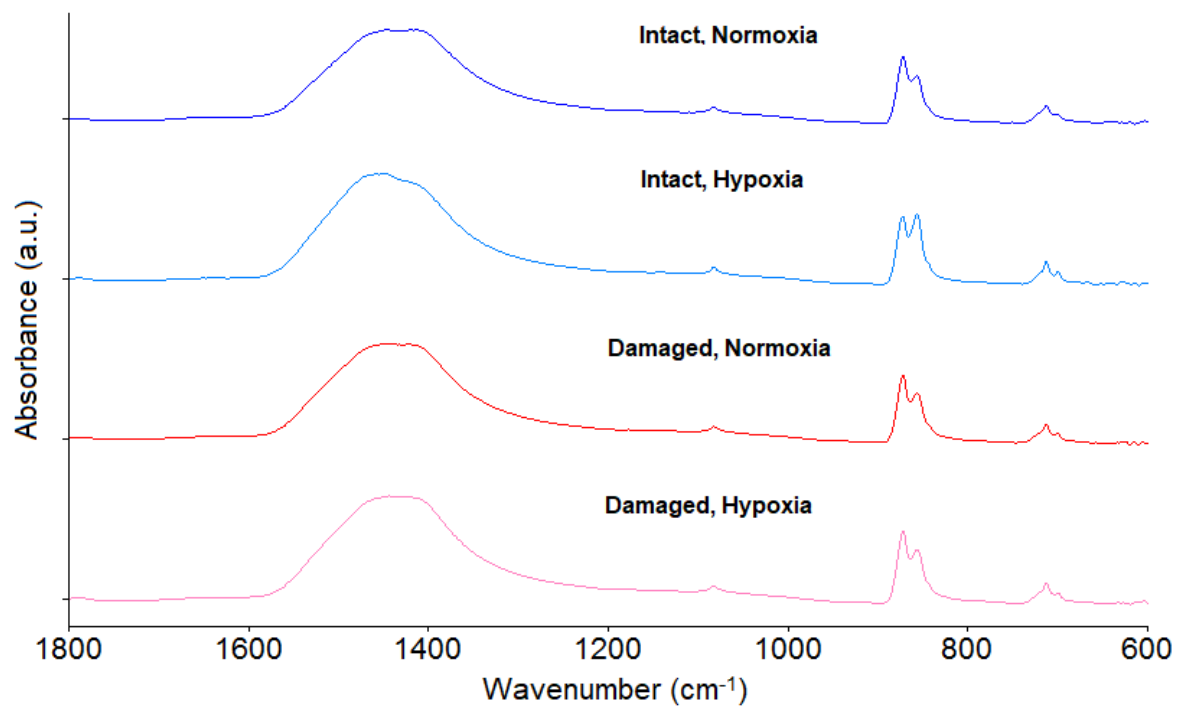

**Figure S2** Infrared spectra for the newly produced shells of *H. diramphus* growing under different treatment conditions.

**Table S1 The seawater parameters under different treatment conditions throughout the exposure period (mean  $\pm$  S.D.). Dissolved oxygen concentration was measured daily using an optical dissolved oxygen probe (SOO-100, TauTheta Instruments, USA). pH was measured daily using a pH meter (HI 9025, HANNA Instruments, USA). Temperature and salinity were measured daily using a thermometer and refractometer, respectively. Total alkalinity was measured weekly using a titrator (HI 84431, HANNA Instruments, USA). Saturation states ( $\Omega$ ) of calcite and aragonite were calculated using the CO2SYS program (Pierrot et al., 2006), with dissociation constants from Mehrbach et al. (1973) refitted by Dickson and Millero (1987).**

|                                                              | Intact, Normoxia | Intact, Hypoxia | Damaged, Normoxia | Damaged, Hypoxia |
|--------------------------------------------------------------|------------------|-----------------|-------------------|------------------|
| <u>Measured parameters</u>                                   |                  |                 |                   |                  |
| Dissolved oxygen (mg O <sub>2</sub> L <sup>-1</sup> )        | 6.04 $\pm$ 0.02  | 2.07 $\pm$ 0.03 | 6.03 $\pm$ 0.01   | 2.05 $\pm$ 0.03  |
| pH (NBS scale)                                               | 8.10 $\pm$ 0.05  | 8.26 $\pm$ 0.04 | 8.09 $\pm$ 0.05   | 8.26 $\pm$ 0.04  |
| Temperature ( $^{\circ}$ C)                                  | 28.2 $\pm$ 0.08  | 28.2 $\pm$ 0.09 | 28.2 $\pm$ 0.08   | 28.2 $\pm$ 0.10  |
| Salinity (psu)                                               | 32.9 $\pm$ 0.35  | 33.0 $\pm$ 0.25 | 33.0 $\pm$ 0.42   | 33.1 $\pm$ 0.25  |
| Total alkalinity ( $\mu$ mol kg <sup>-1</sup> )              | 2241 $\pm$ 8.96  | 2231 $\pm$ 12.2 | 2241 $\pm$ 9.11   | 2243 $\pm$ 9.44  |
| <u>Calculated parameters</u>                                 |                  |                 |                   |                  |
| C <sub>T</sub> ( $\mu$ mol kg <sup>-1</sup> )                | 1984 $\pm$ 26.1  | 1885 $\pm$ 27.9 | 1988 $\pm$ 29.0   | 1895 $\pm$ 24.3  |
| HCO <sub>3</sub> <sup>-</sup> ( $\mu$ mol kg <sup>-1</sup> ) | 1784 $\pm$ 40.2  | 1632 $\pm$ 44.3 | 1790 $\pm$ 45.0   | 1641 $\pm$ 38.5  |
| CO <sub>3</sub> <sup>2-</sup> ( $\mu$ mol kg <sup>-1</sup> ) | 187 $\pm$ 16.1   | 244 $\pm$ 17.6  | 184 $\pm$ 18.3    | 246 $\pm$ 15.4   |
| $\Omega_{\text{calcite}}$                                    | 4.61 $\pm$ 0.40  | 6.01 $\pm$ 0.43 | 4.54 $\pm$ 0.45   | 6.05 $\pm$ 0.38  |
| $\Omega_{\text{aragonite}}$                                  | 3.04 $\pm$ 0.26  | 3.98 $\pm$ 0.29 | 3.01 $\pm$ 0.30   | 4.01 $\pm$ 0.25  |

See Hanna Instruments (2008) and TauTheta Instruments LLC (2007) for the operation manuals of the titrator for total alkalinity and the optical dissolved oxygen probe for dissolved oxygen concentration, respectively.

**Table S2 PERMANOVA table showing the effects of dissolved oxygen (DO) and context on shell growth, mechanical strength, organic matter content, calcite/aragonite, Mg/Ca in calcite, relative ACC content, respiration rate and clearance rate. The bold letters indicate significant difference ( $p < 0.05$ ).**

|                               | <i>df</i> | Mean square           | Pseudo-F           | <i>p</i>     | Comparison of means                                                     |
|-------------------------------|-----------|-----------------------|--------------------|--------------|-------------------------------------------------------------------------|
| <u>Shell growth (Day 21)</u>  |           |                       |                    |              |                                                                         |
| DO                            | 1         | 21.8                  | 5.66               | <b>0.019</b> | Normoxia > Hypoxia                                                      |
| Context                       | 1         | 676                   | 175                | <b>0.001</b> | Damaged > Intact                                                        |
| DO × Context                  | 1         | 0.163                 | 0.042              | 0.838        |                                                                         |
| <u>Mechanical strength</u>    |           |                       |                    |              |                                                                         |
| DO                            | 1         | $2.00 \times 10^{-7}$ | 0.119              | 0.734        |                                                                         |
| Context                       | 1         | $1.97 \times 10^{-5}$ | 11.7               | <b>0.004</b> | Damaged > Intact                                                        |
| DO × Context                  | 1         | $1.69 \times 10^{-7}$ | 0.101              | 0.755        |                                                                         |
| <u>Organic matter content</u> |           |                       |                    |              |                                                                         |
| DO                            | 1         | 1.04                  | 1.10               | 0.309        |                                                                         |
| Context                       | 1         | 9.83                  | 10.5               | <b>0.005</b> | Damaged > Intact                                                        |
| DO × Context                  | 1         | 0.022                 | 0.024              | 0.880        |                                                                         |
| <u>Calcite/Aragonite</u>      |           |                       |                    |              |                                                                         |
| DO                            | 1         | 0.070                 | 11.0               | <b>0.017</b> | Hypoxia > Normoxia                                                      |
| Context                       | 1         | $1.14 \times 10^{-3}$ | 0.178              | 0.623        |                                                                         |
| DO × Context                  | 1         | $8.84 \times 10^{-3}$ | 1.39               | 0.249        |                                                                         |
| <u>Mg/Ca in calcite</u>       |           |                       |                    |              |                                                                         |
| DO                            | 1         | 0.018                 | 16.0               | <b>0.004</b> | Hypoxia > Normoxia                                                      |
| Context                       | 1         | $6.92 \times 10^{-4}$ | 0.618              | 0.455        |                                                                         |
| DO × Context                  | 1         | $4.83 \times 10^{-4}$ | 0.431              | 0.530        |                                                                         |
| <u>Relative ACC content</u>   |           |                       |                    |              |                                                                         |
| DO                            | 1         | 0.355                 | 6.02               | <b>0.047</b> | Hypoxia > Normoxia                                                      |
| Context                       | 1         | 0.199                 | 3.37               | 0.104        |                                                                         |
| DO × Context                  | 1         | 0.116                 | 1.97               | 0.206        |                                                                         |
| <u>Respiration rate</u>       |           |                       |                    |              |                                                                         |
| DO                            | 1         | $2.15 \times 10^{-3}$ | $4.36 \times 10^3$ | <b>0.001</b> | Normoxia > Hypoxia                                                      |
| Context                       | 1         | $8.52 \times 10^{-6}$ | 14.2               | <b>0.001</b> | Intact > Damaged                                                        |
| DO × Context                  | 1         | $7.40 \times 10^{-8}$ | 0.150              | 0.715        |                                                                         |
| <u>Clearance rate</u>         |           |                       |                    |              |                                                                         |
| DO                            | 1         | 84.0                  | 140                | <b>0.001</b> | Within Intact: Normoxia > Hypoxia<br>Within Damaged: Normoxia > Hypoxia |
| Context                       | 1         | 89.1                  | 148                | <b>0.001</b> | Within Normoxia: Intact > Damaged<br>Within Hypoxia: N.S.               |
| DO × Context                  | 1         | 57.2                  | 95.5               | <b>0.001</b> |                                                                         |

## References

Dickson, A.G. and Millero, F.J.: A comparison of the equilibrium constants for the dissociation of carbonic acid in seawater media, *Deep Sea Res. A*, 34, 1733–1743, 1987.

Hanna Instruments: Instruction Manual - HI 84431 Total Alkalinity Minitrator & pH Meter for Water Analysis. <<https://www.manualslib.com/manual/530078/Hanna-Instruments-Hi-84431.html#manual>>, 2008.

Mehrbach, C., Culberso, C.H., Hawley, J.E., and Pytkowic, R.M.: Measurement of apparent dissociation-constants of carbonic-acid in seawater at atmospheric-pressure, *Limnol. Oceanogr.*, 18, 897–907, 1973.

Pierrot, D., Lewis, E., and Wallace, D.W.R.: MS Excel Program Developed for CO<sub>2</sub> System Calculations. ORNL/CDIAC-105a. Carbon Dioxide Information Analysis Center, Oak Ridge National Laboratory, U.S. Department of Energy, Oak Ridge, Tennessee, 2006.

TauTheta Instruments LLC: Stable Optical Oxygen System - Model SOO-100 and RuggedO<sub>2</sub><sup>TM</sup> Optical Oxygen Sensor - Operator's Manual. <[https://in-situ.com/wp-content/uploads/2015/05/Stable\\_Optical\\_Oxygen\\_System\\_-\\_SOO-100\\_Manual.pdf](https://in-situ.com/wp-content/uploads/2015/05/Stable_Optical_Oxygen_System_-_SOO-100_Manual.pdf)>, 2007.
